# Supplementary material for: Evolutionary patterns of range size, abundance and species richness in Amazonian angiosperm trees
Source: PeerJ. 2016 Sep 6;4:e2402. doi: 10.7717/peerj.2402 (PMC5018673; doi:10.7717/peerj.2402)
Supplement: Supplemental Information 5 [file peerj-04-2402-s008.csv]

Genus	major_group	order	family	subfamily	tribe	subtribe
Piper	Magnoliids	Piperales	Piperaceae	NA	NA	NA
Aristolochia	Magnoliids	Piperales	Aristolochiaceae	NA	NA	NA
Siparuna	Magnoliids	Laurales	Siparunaceae	NA	NA	NA
Hernandia	Magnoliids	Laurales	Hernandiaceae	NA	NA	NA
Mollinedia	Magnoliids	Laurales	Monimiaceae	NA	NA	NA
Sextonia	Magnoliids	Laurales	Lauraceae	NA	NA	NA
Cinnamomum	Magnoliids	Laurales	Lauraceae	NA	NA	NA
Aiouea	Magnoliids	Laurales	Lauraceae	NA	NA	NA
Persea	Magnoliids	Laurales	Lauraceae	NA	NA	NA
Endlicheria	Magnoliids	Laurales	Lauraceae	NA	NA	NA
Nectandra	Magnoliids	Laurales	Lauraceae	NA	NA	NA
Rhodostemonodaphne	Magnoliids	Laurales	Lauraceae	NA	NA	NA
Ocotea	Magnoliids	Laurales	Lauraceae	NA	NA	NA
Aniba	Magnoliids	Laurales	Lauraceae	NA	NA	NA
Licaria	Magnoliids	Laurales	Lauraceae	NA	NA	NA
Chlorocardium	Magnoliids	Laurales	Lauraceae	NA	NA	NA
Beilschmiedia	Magnoliids	Laurales	Lauraceae	NA	NA	NA
Virola	Magnoliids	Magnoliales	Myristicaceae	NA	NA	NA
Osteophloeum	Magnoliids	Magnoliales	Myristicaceae	NA	NA	NA
Iryanthera	Magnoliids	Magnoliales	Myristicaceae	NA	NA	NA
Compsoneura	Magnoliids	Magnoliales	Myristicaceae	NA	NA	NA
Anaxagorea	Magnoliids	Magnoliales	Annonaceae	NA	NA	NA
Mosannona	Magnoliids	Magnoliales	Annonaceae	NA	NA	NA
Oxandra	Magnoliids	Magnoliales	Annonaceae	NA	NA	NA
Klarobelia	Magnoliids	Magnoliales	Annonaceae	NA	NA	NA
Pseudomalmea	Magnoliids	Magnoliales	Annonaceae	NA	NA	NA
Ruizodendron	Magnoliids	Magnoliales	Annonaceae	NA	NA	NA
Ephedranthus	Magnoliids	Magnoliales	Annonaceae	NA	NA	NA
Pseudoxandra	Magnoliids	Magnoliales	Annonaceae	NA	NA	NA
Malmea	Magnoliids	Magnoliales	Annonaceae	NA	NA	NA
Unonopsis	Magnoliids	Magnoliales	Annonaceae	NA	NA	NA
Onychopetalum	Magnoliids	Magnoliales	Annonaceae	NA	NA	NA
Bocageopsis	Magnoliids	Magnoliales	Annonaceae	NA	NA	NA
Tetrameranthus	Magnoliids	Magnoliales	Annonaceae	NA	NA	NA
Trigynaea	Magnoliids	Magnoliales	Annonaceae	NA	NA	NA
Cymbopetalum	Magnoliids	Magnoliales	Annonaceae	NA	NA	NA
Porcelia	Magnoliids	Magnoliales	Annonaceae	NA	NA	NA
Xylopia	Magnoliids	Magnoliales	Annonaceae	NA	NA	NA
Duguetia	Magnoliids	Magnoliales	Annonaceae	NA	NA	NA
Fusaea	Magnoliids	Magnoliales	Annonaceae	NA	NA	NA
Diclinanona	Magnoliids	Magnoliales	Annonaceae	NA	NA	NA
Annona	Magnoliids	Magnoliales	Annonaceae	NA	NA	NA
Rollinia	Magnoliids	Magnoliales	Annonaceae	NA	NA	NA
Guatteria	Magnoliids	Magnoliales	Annonaceae	NA	NA	NA
Guatteriopsis	Magnoliids	Magnoliales	Annonaceae	NA	NA	NA
Magnolia	Magnoliids	Magnoliales	Magnoliaceae	NA	NA	NA
Talauma	Magnoliids	Magnoliales	Magnoliaceae	NA	NA	NA
Hedyosmum	NA	Chloranthales	Chloranthaceae	NA	NA	NA
Smilax	Monocots	Liliales	Smilacaceae	NA	NA	NA
Dioscorea	Monocots	Dioscoreales	Dioscoreaceae	NA	NA	NA
Bambusa	Monocots	Poales	Poaceae	Bambusoideae	Bambuseae	NA
Phytelephas	Monocots	Arecales	Arecaceae	Ceroxyloideae	Phytelepheae	NA
Elaeis	Monocots	Arecales	Arecaceae	Arecoideae	Cocoseae	Elaeidinae
Aiphanes	Monocots	Arecales	Arecaceae	Arecoideae	Cocoseae	Bactridinae
Bactris	Monocots	Arecales	Arecaceae	Arecoideae	Cocoseae	Bactridinae
Astrocaryum	Monocots	Arecales	Arecaceae	Arecoideae	Cocoseae	Bactridinae
Syagrus	Monocots	Arecales	Arecaceae	Arecoideae	Cocoseae	Attaleinae
Attalea	Monocots	Arecales	Arecaceae	Arecoideae	Cocoseae	Attaleinae
Scheelea	Monocots	Arecales	Arecaceae	Arecoideae	Cocoseae	Attaleinae
Prestoea	Monocots	Arecales	Arecaceae	Arecoideae	Euterpeae	NA
Euterpe	Monocots	Arecales	Arecaceae	Arecoideae	Euterpeae	NA
Oenocarpus	Monocots	Arecales	Arecaceae	Arecoideae	Euterpeae	NA
Geonoma	Monocots	Arecales	Arecaceae	Arecoideae	Geonomateae	NA
Roystonea	Monocots	Arecales	Arecaceae	Arecoideae	Roystoneeae	NA
Chamaedorea	Monocots	Arecales	Arecaceae	Arecoideae	Chamaedoreeae	NA
Socratea	Monocots	Arecales	Arecaceae	Arecoideae	Iriarteeae	NA
Iriartea	Monocots	Arecales	Arecaceae	Arecoideae	Iriarteeae	NA
Dictyocaryum	Monocots	Arecales	Arecaceae	Arecoideae	Iriarteeae	NA
Wettinia	Monocots	Arecales	Arecaceae	Arecoideae	Iriarteeae	NA
Chelyocarpus	Monocots	Arecales	Arecaceae	Coryphoideae	Cryosophileae	NA
Sabal	Monocots	Arecales	Arecaceae	Coryphoideae	Sabaleae	NA
Mauritiella	Monocots	Arecales	Arecaceae	NA	NA	Mauritiinae
Mauritia	Monocots	Arecales	Arecaceae	NA	NA	Mauritiinae
Hyperbaena	NA	NA	Menispermaceae	NA	NA	NA
Abuta	NA	NA	Menispermaceae	NA	NA	NA
Oxalis	Rosids	Oxalidales	Oxalidaceae	NA	NA	NA
Rourea	Rosids	Oxalidales	Connaraceae	NA	NA	NA
Connarus	Rosids	Oxalidales	Connaraceae	NA	NA	NA
Sloanea	Rosids	Oxalidales	Elaeocarpaceae	NA	NA	NA
Weinmannia	Rosids	Oxalidales	Cunoniaceae	NA	NA	NA
Brunellia	Rosids	Oxalidales	Brunelliaceae	NA	NA	NA
Ruptiliocarpon	Rosids	Celastrales	Lepidobotryaceae	NA	NA	NA
Zinowiewia	Rosids	Celastrales	Celastraceae	NA	NA	NA
Maytenus	Rosids	Celastrales	Celastraceae	NA	NA	NA
Salacia	Rosids	Celastrales	Celastraceae	NA	NA	NA
Cheiloclinium	Rosids	Celastrales	Celastraceae	NA	NA	NA
Drypetes	Rosids	Malpighiales	Putranjivaceae	NA	NA	NA
Humiria	Rosids	Malpighiales	Humiriaceae	NA	NA	NA
Sacoglottis	Rosids	Malpighiales	Humiriaceae	NA	NA	NA
Humiriastrum	Rosids	Malpighiales	Humiriaceae	NA	NA	NA
Vantanea	Rosids	Malpighiales	Humiriaceae	NA	NA	NA
Salix	Rosids	Malpighiales	Salicaceae	NA	Saliceae	NA
Homalium	Rosids	Malpighiales	Salicaceae	NA	Homalieae	NA
Xylosma	Rosids	Malpighiales	Salicaceae	NA	NA	NA
Pleuranthodendron	Rosids	Malpighiales	Salicaceae	NA	Prockieae	NA
Hasseltia	Rosids	Malpighiales	Salicaceae	NA	Prockieae	NA
Vismia	Rosids	Malpighiales	Hypericaceae	NA	Vismieae	NA
Tetrathylacium	Rosids	Malpighiales	Salicaceae	NA	Samydeae	NA
Lunania	Rosids	Malpighiales	Salicaceae	NA	Samydeae	NA
Laetia	Rosids	Malpighiales	Salicaceae	NA	Samydeae	NA
Casearia	Rosids	Malpighiales	Salicaceae	NA	Samydeae	NA
Lacistema	Rosids	Malpighiales	Lacistemataceae	NA	NA	NA
Lozania	Rosids	Malpighiales	Lacistemataceae	NA	NA	NA
Goupia	Rosids	Malpighiales	Goupiaceae	NA	NA	NA
Rinorea	Rosids	Malpighiales	Violaceae	NA	NA	NA
Paypayrola	Rosids	Malpighiales	Violaceae	NA	NA	NA
Leonia	Rosids	Malpighiales	Violaceae	NA	NA	NA
Gloeospermum	Rosids	Malpighiales	Violaceae	NA	NA	NA
Hybanthus	Rosids	Malpighiales	Violaceae	NA	NA	NA
Amphirrhox	Rosids	Malpighiales	Violaceae	NA	NA	NA
Viola	Rosids	Malpighiales	Violaceae	NA	NA	NA
Lindackeria	Rosids	Malpighiales	Achariaceae	NA	Lindackerieae	NA
Turnera	Rosids	Malpighiales	Passifloraceae	NA	NA	NA
Passiflora	Rosids	Malpighiales	Passifloraceae	NA	NA	NA
Erythroxylum	Rosids	Malpighiales	Erythroxylaceae	NA	NA	NA
Rhizophora	Rosids	Malpighiales	Rhizophoraceae	NA	NA	NA
Sterigmapetalum	Rosids	Malpighiales	Rhizophoraceae	NA	NA	NA
Cassipourea	Rosids	Malpighiales	Rhizophoraceae	NA	NA	NA
Trigonia	Rosids	Malpighiales	Trigoniaceae	NA	NA	NA
Exellodendron	Rosids	Malpighiales	Chrysobalanaceae	NA	NA	NA
Parinari	Rosids	Malpighiales	Chrysobalanaceae	NA	NA	NA
Chrysobalanus	Rosids	Malpighiales	Chrysobalanaceae	NA	NA	NA
Licania	Rosids	Malpighiales	Chrysobalanaceae	NA	NA	NA
Hirtella	Rosids	Malpighiales	Chrysobalanaceae	NA	NA	NA
Couepia	Rosids	Malpighiales	Chrysobalanaceae	NA	NA	NA
Tapura	Rosids	Malpighiales	Dichapetalaceae	NA	NA	NA
Dichapetalum	Rosids	Malpighiales	Dichapetalaceae	NA	NA	NA
Cyrillopsis	Rosids	Malpighiales	Ixonanthaceae	NA	NA	NA
Ochthocosmus	Rosids	Malpighiales	Ixonanthaceae	NA	NA	NA
Caryocar	Rosids	Malpighiales	Caryocaraceae	NA	NA	NA
Anthodiscus	Rosids	Malpighiales	Caryocaraceae	NA	NA	NA
Ouratea	Rosids	Malpighiales	Ochnaceae	NA	NA	NA
Elvasia	Rosids	Malpighiales	Ochnaceae	NA	NA	NA
Quiina	Rosids	Malpighiales	Ochnaceae	NA	NA	NA
Lacunaria	Rosids	Malpighiales	Ochnaceae	NA	NA	NA
Touroulia	Rosids	Malpighiales	Ochnaceae	NA	NA	NA
Cespedesia	Rosids	Malpighiales	Ochnaceae	NA	NA	NA
Sauvagesia	Rosids	Malpighiales	Ochnaceae	NA	NA	NA
Amanoa	Rosids	Malpighiales	Phyllanthaceae	NA	Amanoeae	NA
Margaritaria	Rosids	Malpighiales	Phyllanthaceae	NA	Phyllantheae	NA
Phyllanthus	Rosids	Malpighiales	Phyllanthaceae	NA	Phyllantheae	NA
Richeria	Rosids	Malpighiales	Phyllanthaceae	NA	Antidesmeae	NA
Hieronyma	Rosids	Malpighiales	Phyllanthaceae	NA	Antidesmeae	NA
Podocalyx	Rosids	Malpighiales	Picrodendraceae	NA	NA	NA
Hebepetalum	Rosids	Malpighiales	Linaceae	NA	NA	NA
Roucheria	Rosids	Malpighiales	Linaceae	NA	NA	NA
Byrsonima	Rosids	Malpighiales	Malpighiaceae	NA	NA	NA
Spachea	Rosids	Malpighiales	Malpighiaceae	NA	NA	NA
Pterandra	Rosids	Malpighiales	Malpighiaceae	NA	NA	NA
Hiraea	Rosids	Malpighiales	Malpighiaceae	NA	NA	NA
Bunchosia	Rosids	Malpighiales	Malpighiaceae	NA	NA	NA
Mascagnia	Rosids	Malpighiales	Malpighiaceae	NA	NA	NA
Tetrapterys	Rosids	Malpighiales	Malpighiaceae	NA	NA	NA
Heteropterys	Rosids	Malpighiales	Malpighiaceae	NA	NA	NA
Malpighia	Rosids	Malpighiales	Malpighiaceae	NA	NA	NA
Banisteriopsis	Rosids	Malpighiales	Malpighiaceae	NA	NA	NA
Stigmaphyllon	Rosids	Malpighiales	Malpighiaceae	NA	NA	NA
Cnidoscolus	Rosids	Malpighiales	Euphorbiaceae	Crotonoideae1	Manihoteae	NA
Manihot	Rosids	Malpighiales	Euphorbiaceae	Crotonoideae1	Manihoteae	NA
Hevea	Rosids	Malpighiales	Euphorbiaceae	Crotonoideae1	NA	NA
Micrandra	Rosids	Malpighiales	Euphorbiaceae	Crotonoideae1	NA	NA
Glycydendron	Rosids	Malpighiales	Euphorbiaceae	Crotonoideae1	NA	NA
Omphalea	Rosids	Malpighiales	Euphorbiaceae	Crotonoideae1	Omphaleae	NA
Tetrorchidium	Rosids	Malpighiales	Euphorbiaceae	Crotonoideae1	NA	NA
Nealchornea	Rosids	Malpighiales	Euphorbiaceae	Euphorbioideae	Stomatocalyceae	NA
Mabea	Rosids	Malpighiales	Euphorbiaceae	Euphorbioideae	Hippomaneae	NA
Gymnanthes	Rosids	Malpighiales	Euphorbiaceae	Euphorbioideae	Hippomaneae	NA
Hura	Rosids	Malpighiales	Euphorbiaceae	Euphorbioideae	Hippomaneae	NA
Sapium	Rosids	Malpighiales	Euphorbiaceae	Euphorbioideae	Hippomaneae	NA
Sebastiania	Rosids	Malpighiales	Euphorbiaceae	Euphorbioideae	Hippomaneae	NA
Euphorbia	Rosids	Malpighiales	Euphorbiaceae	Euphorbioideae	Euphorbieae	NA
Pedilanthus	Rosids	Malpighiales	Euphorbiaceae	Euphorbioideae	Euphorbieae	NA
Acalypha	Rosids	Malpighiales	Euphorbiaceae	Acalyphoideae	NA	NA
Adelia	Rosids	Malpighiales	Euphorbiaceae	Acalyphoideae	Adelieae	NA
Cleidion	Rosids	Malpighiales	Euphorbiaceae	Acalyphoideae	NA	NA
Caryodendron	Rosids	Malpighiales	Euphorbiaceae	Acalyphoideae	NA	NA
Dalechampia	Rosids	Malpighiales	Euphorbiaceae	Acalyphoideae	Plukenetieae	NA
Alchorneopsis	Rosids	Malpighiales	Euphorbiaceae	Acalyphoideae	NA	NA
Gavarretia	Rosids	Malpighiales	Euphorbiaceae	Acalyphoideae	Alchorneae	NA
Conceveiba	Rosids	Malpighiales	Euphorbiaceae	Acalyphoideae	Alchorneae	NA
Alchornea	Rosids	Malpighiales	Euphorbiaceae	Acalyphoideae	Alchorneae	NA
Aparisthmium	Rosids	Malpighiales	Euphorbiaceae	Acalyphoideae	Alchorneae	NA
Pausandra	Rosids	Malpighiales	Euphorbiaceae	Crotonoideae2	NA	NA
Croton	Rosids	Malpighiales	Euphorbiaceae	Crotonoideae2	Crotoneae	NA
Sagotia	Rosids	Malpighiales	Euphorbiaceae	Crotonoideae2	NA	NA
Sandwithia	Rosids	Malpighiales	Euphorbiaceae	Crotonoideae2	Aleuritideae	NA
Joannesia	Rosids	Malpighiales	Euphorbiaceae	Crotonoideae2	Jatropheae	NA
Jatropha	Rosids	Malpighiales	Euphorbiaceae	Crotonoideae2	Jatropheae	NA
Maprounea	Rosids	Malpighiales	Euphorbiaceae	NA	NA	NA
Pogonophora	Rosids	Malpighiales	Euphorbiaceae	NA	NA	NA
Chaetocarpus	Rosids	Malpighiales	Euphorbiaceae	NA	Chaetocarpeae	NA
Pera	Rosids	Malpighiales	Euphorbiaceae	NA	NA	NA
Bonnetia	Rosids	Malpighiales	Bonnetiaceae	NA	NA	NA
Calophyllum	Rosids	Malpighiales	Calophyllaceae	NA	NA	NA
Caraipa	Rosids	Malpighiales	Calophyllaceae	NA	NA	NA
Haploclathra	Rosids	Malpighiales	Calophyllaceae	NA	NA	NA
Mahurea	Rosids	Malpighiales	Calophyllaceae	NA	NA	NA
Marila	Rosids	Malpighiales	Calophyllaceae	NA	NA	NA
Chrysochlamys	Rosids	Malpighiales	Clusiaceae	NA	Clusieae	NA
Clusia	Rosids	Malpighiales	Clusiaceae	NA	Clusieae	NA
Dystovomita	Rosids	Malpighiales	Clusiaceae	NA	Clusieae	NA
Tovomita	Rosids	Malpighiales	Clusiaceae	NA	Clusieae	NA
Garcinia	Rosids	Malpighiales	Clusiaceae	NA	Garcinieae	NA
Symphonia	Rosids	Malpighiales	Clusiaceae	NA	Symphonieae	NA
Platonia	Rosids	Malpighiales	Clusiaceae	NA	Symphonieae	NA
Moronobea	Rosids	Malpighiales	Clusiaceae	NA	Symphonieae	NA
Bauhinia	Rosids	Fabales	Fabaceae	NA	Cercideae	NA
Macrolobium	Rosids	Fabales	Fabaceae	NA	Detarieae	NA
Eperua	Rosids	Fabales	Fabaceae	NA	Detarieae	NA
Peltogyne	Rosids	Fabales	Fabaceae	NA	Detarieae	NA
Hymenaea	Rosids	Fabales	Fabaceae	NA	Detarieae	NA
Browneopsis	Rosids	Fabales	Fabaceae	NA	Detarieae	NA
Brownea	Rosids	Fabales	Fabaceae	NA	Detarieae	NA
Dicymbe	Rosids	Fabales	Fabaceae	NA	Detarieae	NA
Cynometra	Rosids	Fabales	Fabaceae	NA	Detarieae	NA
Crudia	Rosids	Fabales	Fabaceae	NA	Detarieae	NA
Apuleia	Rosids	Fabales	Fabaceae	NA	Cassieae2	NA
Dicorynia	Rosids	Fabales	Fabaceae	NA	Cassieae2	NA
Dialium	Rosids	Fabales	Fabaceae	NA	Cassieae2	NA
Caesalpinia	Rosids	Fabales	Fabaceae	NA	NA	NA
Vouacapoua	Rosids	Fabales	Fabaceae	NA	NA	NA
Batesia	Rosids	Fabales	Fabaceae	NA	NA	NA
Senna	Rosids	Fabales	Fabaceae	NA	Cassieae1	NA
Cassia	Rosids	Fabales	Fabaceae	NA	Cassieae1	NA
Pterogyne	Rosids	Fabales	Fabaceae	NA	Cassieae1	NA
Chamaecrista	Rosids	Fabales	Fabaceae	NA	Cassieae1	NA
Tachigali	Rosids	Fabales	Fabaceae	NA	NA	NA
Recordoxylon	Rosids	Fabales	Fabaceae	NA	NA	NA
Schizolobium	Rosids	Fabales	Fabaceae	NA	NA	NA
Inga	Rosids	Fabales	Fabaceae	Mimosoideae	Ingeae	NA
Enterolobium	Rosids	Fabales	Fabaceae	Mimosoideae	Ingeae	NA
Zygia	Rosids	Fabales	Fabaceae	Mimosoideae	Ingeae	NA
Cedrelinga	Rosids	Fabales	Fabaceae	Mimosoideae	Ingeae	NA
Albizia	Rosids	Fabales	Fabaceae	Mimosoideae	Ingeae	NA
Balizia	Rosids	Fabales	Fabaceae	Mimosoideae	Ingeae	NA
Abarema	Rosids	Fabales	Fabaceae	Mimosoideae	Ingeae	NA
Cojoba	Rosids	Fabales	Fabaceae	Mimosoideae	Ingeae	NA
Calliandra	Rosids	Fabales	Fabaceae	Mimosoideae	Ingeae	NA
Piptadenia	Rosids	Fabales	Fabaceae	Mimosoideae	NA	NA
Anadenanthera	Rosids	Fabales	Fabaceae	Mimosoideae	Acacieae	NA
Acacia	Rosids	Fabales	Fabaceae	Mimosoideae	Acacieae	NA
Parkia	Rosids	Fabales	Fabaceae	Mimosoideae	Acacieae	NA
Mimosa	Rosids	Fabales	Fabaceae	Mimosoideae	Mimoseae	NA
Stryphnodendron	Rosids	Fabales	Fabaceae	Mimosoideae	Mimoseae	NA
Pseudopiptadenia	Rosids	Fabales	Fabaceae	Mimosoideae	Mimoseae	NA
Andira	Rosids	Fabales	Fabaceae	Papilionoideae	Dalbergieae2	NA
Hymenolobium	Rosids	Fabales	Fabaceae	Papilionoideae	Dalbergieae2	NA
Lecointea	Rosids	Fabales	Fabaceae	Papilionoideae	NA	NA
Machaerium	Rosids	Fabales	Fabaceae	Papilionoideae	Dalbergieae1	NA
Dalbergia	Rosids	Fabales	Fabaceae	Papilionoideae	Dalbergieae1	NA
Platymiscium	Rosids	Fabales	Fabaceae	Papilionoideae	Dalbergieae1	NA
Platypodium	Rosids	Fabales	Fabaceae	Papilionoideae	Dalbergieae1	NA
Centrolobium	Rosids	Fabales	Fabaceae	Papilionoideae	Dalbergieae1	NA
Dioclea	Rosids	Fabales	Fabaceae	Papilionoideae	NA	NA
Pterocarpus	Rosids	Fabales	Fabaceae	Papilionoideae	NA	NA
Lonchocarpus	Rosids	Fabales	Fabaceae	Papilionoideae	Millettieae	NA
Derris	Rosids	Fabales	Fabaceae	Papilionoideae	Millettieae	NA
Clitoria	Rosids	Fabales	Fabaceae	Papilionoideae	Phaseoleae	NA
Erythrina	Rosids	Fabales	Fabaceae	Papilionoideae	Phaseoleae	NA
Vatairea	Rosids	Fabales	Fabaceae	Papilionoideae	Vataireoid	NA
Vataireopsis	Rosids	Fabales	Fabaceae	Papilionoideae	Vataireoid	NA
Sweetia	Rosids	Fabales	Fabaceae	Papilionoideae	Vataireoid	NA
Ormosia	Rosids	Fabales	Fabaceae	Papilionoideae	NA	NA
Acosmium	Rosids	Fabales	Fabaceae	Papilionoideae	NA	NA
Diplotropis	Rosids	Fabales	Fabaceae	Papilionoideae	NA	NA
Crotalaria	Rosids	Fabales	Fabaceae	Papilionoideae	Crotalarieae	NA
Poecilanthe	Rosids	Fabales	Fabaceae	Papilionoideae	Brongniartieae	NA
Cyclolobium	Rosids	Fabales	Fabaceae	Papilionoideae	Brongniartieae	NA
Ateleia	Rosids	Fabales	Fabaceae	Papilionoideae	Swartzieae	NA
Bocoa	Rosids	Fabales	Fabaceae	Papilionoideae	Swartzieae	NA
Swartzia	Rosids	Fabales	Fabaceae	Papilionoideae	Swartzieae	NA
Alexa	Rosids	Fabales	Fabaceae	Papilionoideae	NA	NA
Aldina	Rosids	Fabales	Fabaceae	Papilionoideae	Dalbergieae2	NA
Dussia	Rosids	Fabales	Fabaceae	Papilionoideae	NA	NA
Dipteryx	Rosids	Fabales	Fabaceae	Papilionoideae	Dipterygeae	NA
Taralea	Rosids	Fabales	Fabaceae	Papilionoideae	Dipterygeae	NA
Myroxylon	Rosids	Fabales	Fabaceae	Papilionoideae	NA	NA
Myrospermum	Rosids	Fabales	Fabaceae	Papilionoideae	NA	NA
Moutabea	Rosids	Fabales	Polygalaceae	NA	NA	NA
Polygala	Rosids	Fabales	Polygalaceae	NA	NA	NA
Monnina	Rosids	Fabales	Polygalaceae	NA	NA	NA
Securidaca	Rosids	Fabales	Polygalaceae	NA	NA	NA
Prunus	Rosids	Rosales	Rosaceae	Maloideae	NA	NA
Ziziphus	Rosids	Rosales	Rhamnaceae	NA	Paliureae	NA
Colubrina	Rosids	Rosales	Rhamnaceae	NA	NA	NA
Gouania	Rosids	Rosales	Rhamnaceae	NA	Gouanieae	NA
Rhamnus	Rosids	Rosales	Rhamnaceae	NA	Rhamneae	NA
Rhamnidium	Rosids	Rosales	Rhamnaceae	NA	Rhamneae	NA
Boehmeria	Rosids	Rosales	Urticaceae	NA	NA	NA
Myriocarpa	Rosids	Rosales	Urticaceae	NA	NA	NA
Pilea	Rosids	Rosales	Urticaceae	NA	NA	NA
Urera	Rosids	Rosales	Urticaceae	NA	NA	NA
Pourouma	Rosids	Rosales	Urticaceae	NA	NA	NA
Cecropia	Rosids	Rosales	Urticaceae	NA	NA	NA
Trema	Rosids	Rosales	Cannabaceae	NA	NA	NA
Morus	Rosids	Rosales	Moraceae	NA	NA	NA
Maclura	Rosids	Rosales	Moraceae	NA	NA	NA
Clarisia	Rosids	Rosales	Moraceae	NA	NA	NA
Batocarpus	Rosids	Rosales	Moraceae	NA	NA	NA
Sorocea	Rosids	Rosales	Moraceae	NA	NA	NA
Bagassa	Rosids	Rosales	Moraceae	NA	NA	NA
Trophis	Rosids	Rosales	Moraceae	NA	NA	NA
Ficus	Rosids	Rosales	Moraceae	NA	NA	NA
Naucleopsis	Rosids	Rosales	Moraceae	NA	NA	NA
Helicostylis	Rosids	Rosales	Moraceae	NA	NA	NA
Castilla	Rosids	Rosales	Moraceae	NA	NA	NA
Perebea	Rosids	Rosales	Moraceae	NA	NA	NA
Poulsenia	Rosids	Rosales	Moraceae	NA	NA	NA
Pseudolmedia	Rosids	Rosales	Moraceae	NA	NA	NA
Maquira	Rosids	Rosales	Moraceae	NA	NA	NA
Trymatococcus	Rosids	Rosales	Moraceae	NA	NA	NA
Brosimum	Rosids	Rosales	Moraceae	NA	NA	NA
Celtis	Rosids	Rosales	NA	NA	NA	NA
Phyllostylon	Rosids	Rosales	Ulmaceae	NA	NA	NA
Ampelocera	Rosids	Rosales	Ulmaceae	NA	NA	NA
Quercus	Rosids	Fagales	Fagaceae	NA	NA	NA
Anisophyllea	Rosids	Cucurbitales	Anisophylleaceae	NA	NA	NA
Cayaponia	Rosids	Cucurbitales	Cucurbitaceae	NA	Cucurbiteae	NA
Gurania	Rosids	Cucurbitales	Cucurbitaceae	NA	Coniandreae	NA
Picramnia	Rosids	Picramniales	Picramniaceae	NA	NA	NA
Turpinia	Rosids	Crossosomatales	Staphyleaceae	NA	NA	NA
Cuphea	Rosids	Myrtales	Lythraceae	NA	NA	NA
Lafoensia	Rosids	Myrtales	Lythraceae	NA	NA	NA
Combretum	Rosids	Myrtales	Combretaceae	NA	NA	NA
Terminalia	Rosids	Myrtales	Combretaceae	NA	NA	NA
Buchenavia	Rosids	Myrtales	Combretaceae	NA	NA	NA
Mouriri	Rosids	Myrtales	Melastomataceae	NA	NA	NA
Tococa	Rosids	Myrtales	Melastomataceae	NA	NA	NA
Tetrazygia	Rosids	Myrtales	Melastomataceae	NA	NA	NA
Clidemia	Rosids	Myrtales	Melastomataceae	NA	NA	NA
Miconia	Rosids	Myrtales	Melastomataceae	NA	NA	NA
Conostegia	Rosids	Myrtales	Melastomataceae	NA	NA	NA
Leandra	Rosids	Myrtales	Melastomataceae	NA	NA	NA
Graffenrieda	Rosids	Myrtales	Melastomataceae	NA	NA	NA
Meriania	Rosids	Myrtales	Melastomataceae	NA	NA	NA
Bellucia	Rosids	Myrtales	Melastomataceae	NA	NA	NA
Loreya	Rosids	Myrtales	Melastomataceae	NA	NA	NA
Henriettella	Rosids	Myrtales	Melastomataceae	NA	NA	NA
Henriettea	Rosids	Myrtales	Melastomataceae	NA	NA	NA
Blakea	Rosids	Myrtales	Melastomataceae	NA	NA	NA
Rhynchanthera	Rosids	Myrtales	Melastomataceae	NA	NA	NA
Macairea	Rosids	Myrtales	Melastomataceae	NA	NA	NA
Tibouchina	Rosids	Myrtales	Melastomataceae	NA	NA	NA
Macrocentrum	Rosids	Myrtales	Melastomataceae	NA	NA	NA
Triolena	Rosids	Myrtales	Melastomataceae	NA	NA	NA
Ruizterania	Rosids	Myrtales	Vochysiaceae	NA	NA	NA
Qualea	Rosids	Myrtales	Vochysiaceae	NA	NA	NA
Vochysia	Rosids	Myrtales	Vochysiaceae	NA	NA	NA
Erisma	Rosids	Myrtales	Vochysiaceae	NA	NA	NA
Eugenia	Rosids	Myrtales	Myrtaceae	NA	NA	NA
Plinia	Rosids	Myrtales	Myrtaceae	NA	NA	NA
Myrcia	Rosids	Myrtales	Myrtaceae	NA	NA	NA
Myrcianthes	Rosids	Myrtales	Myrtaceae	NA	NA	NA
Calyptranthes	Rosids	Myrtales	Myrtaceae	NA	NA	NA
Myrciaria	Rosids	Myrtales	Myrtaceae	NA	NA	NA
Psidium	Rosids	Myrtales	Myrtaceae	NA	NA	NA
Trattinnickia	Rosids	Sapindales	Burseraceae	NA	NA	NA
Dacryodes	Rosids	Sapindales	Burseraceae	NA	NA	NA
Crepidospermum	Rosids	Sapindales	Burseraceae	NA	NA	NA
Protium	Rosids	Sapindales	Burseraceae	NA	NA	NA
Tetragastris	Rosids	Sapindales	Burseraceae	NA	NA	NA
Bursera	Rosids	Sapindales	Burseraceae	NA	NA	NA
Commiphora	Rosids	Sapindales	Burseraceae	NA	NA	NA
Anacardium	Rosids	Sapindales	Anacardiaceae	NA	NA	NA
Thyrsodium	Rosids	Sapindales	Anacardiaceae	NA	NA	NA
Schinopsis	Rosids	Sapindales	Anacardiaceae	NA	NA	NA
Astronium	Rosids	Sapindales	Anacardiaceae	NA	NA	NA
Spondias	Rosids	Sapindales	Anacardiaceae	NA	NA	NA
Tapirira	Rosids	Sapindales	Anacardiaceae	NA	NA	NA
Trichilia	Rosids	Sapindales	Meliaceae	NA	NA	NA
Cabralea	Rosids	Sapindales	Meliaceae	NA	NA	NA
Guarea	Rosids	Sapindales	Meliaceae	NA	NA	NA
Ruagea	Rosids	Sapindales	Meliaceae	NA	NA	NA
Cedrela	Rosids	Sapindales	Meliaceae	NA	NA	NA
Swietenia	Rosids	Sapindales	Meliaceae	NA	NA	NA
Carapa	Rosids	Sapindales	Meliaceae	NA	NA	NA
Quassia	Rosids	Sapindales	Simaroubaceae	NA	NA	NA
Picrolemma	Rosids	Sapindales	Simaroubaceae	NA	NA	NA
Simaba	Rosids	Sapindales	Simaroubaceae	NA	NA	NA
Simarouba	Rosids	Sapindales	Simaroubaceae	NA	NA	NA
Spathelia	Rosids	Sapindales	Rutaceae	NA	NA	NA
Citrus	Rosids	Sapindales	Rutaceae	NA	NA	NA
Hortia	Rosids	Sapindales	Rutaceae	NA	NA	NA
Galipea	Rosids	Sapindales	Rutaceae	NA	NA	NA
Zanthoxylum	Rosids	Sapindales	Rutaceae	NA	NA	NA
Sapindus	Rosids	Sapindales	Sapindaceae	NA	NA	NA
Allophylus	Rosids	Sapindales	Sapindaceae	NA	NA	NA
Paullinia	Rosids	Sapindales	Sapindaceae	NA	NA	NA
Serjania	Rosids	Sapindales	Sapindaceae	NA	NA	NA
Talisia	Rosids	Sapindales	Sapindaceae	NA	NA	NA
Melicoccus	Rosids	Sapindales	Sapindaceae	NA	NA	NA
Matayba	Rosids	Sapindales	Sapindaceae	NA	NA	NA
Cupania	Rosids	Sapindales	Sapindaceae	NA	NA	NA
Vouarana	Rosids	Sapindales	Sapindaceae	NA	NA	NA
Huertea	Rosids	Huerteales	Tapisciaceae	NA	NA	NA
Perrottetia	Rosids	Huerteales	Dipentodontaceae	NA	NA	NA
Bixa	Rosids	Malvales	Bixaceae	NA	NA	NA
Cochlospermum	Rosids	Malvales	Bixaceae	NA	NA	NA
Heliocarpus	Rosids	Malvales	Malvaceae	Grewioideae	NA	NA
Apeiba	Rosids	Malvales	Malvaceae	Grewioideae	NA	NA
Lueheopsis	Rosids	Malvales	Malvaceae	Grewioideae	NA	NA
Luehea	Rosids	Malvales	Malvaceae	NA	NA	NA
Helicteres	Rosids	Malvales	Malvaceae	Helicteroideae	NA	NA
Matisia	Rosids	Malvales	Malvaceae	NA	NA	NA
Sterculia	Rosids	Malvales	Malvaceae	Sterculioideae	NA	NA
Pentaplaris	Rosids	Malvales	Malvaceae	Bombacoideae	NA	NA
Quararibea	Rosids	Malvales	Malvaceae	Bombacoideae	NA	NA
Scleronema	Rosids	Malvales	Malvaceae	Bombacoideae	NA	NA
Ochroma	Rosids	Malvales	Malvaceae	Bombacoideae	NA	NA
Cavanillesia	Rosids	Malvales	Malvaceae	Bombacoideae	NA	NA
Ceiba	Rosids	Malvales	Malvaceae	Bombacoideae	NA	NA
Chorisia	Rosids	Malvales	Malvaceae	Bombacoideae	NA	NA
Pseudobombax	Rosids	Malvales	Malvaceae	Bombacoideae	NA	NA
Bombax	Rosids	Malvales	Malvaceae	Bombacoideae	NA	NA
Catostemma	Rosids	Malvales	Malvaceae	Bombacoideae	NA	NA
Pachira	Rosids	Malvales	Malvaceae	Bombacoideae	NA	NA
Eriotheca	Rosids	Malvales	Malvaceae	Bombacoideae	NA	NA
Bombacopsis	Rosids	Malvales	Malvaceae	Bombacoideae	NA	NA
Sida	Rosids	Malvales	Malvaceae	Malvoideae	NA	NA
Hibiscus	Rosids	Malvales	Malvaceae	Malvoideae	NA	NA
Pavonia	Rosids	Malvales	Malvaceae	Malvoideae	NA	NA
Abutilon	Rosids	Malvales	Malvaceae	Malvoideae	NA	NA
Gossypium	Rosids	Malvales	Malvaceae	Malvoideae	NA	NA
Hampea	Rosids	Malvales	Malvaceae	Malvoideae	NA	NA
Byttneria	Rosids	Malvales	Malvaceae	Byttnerioideae	NA	NA
Theobroma	Rosids	Malvales	Malvaceae	Byttnerioideae	NA	NA
Herrania	Rosids	Malvales	Malvaceae	Byttnerioideae	NA	NA
Guazuma	Rosids	Malvales	Malvaceae	Byttnerioideae	NA	NA
Capparis	Rosids	Brassicales	Capparaceae	NA	NA	NA
Carica	Rosids	Brassicales	Caricaceae	NA	NA	NA
Jacaratia	Rosids	Brassicales	Caricaceae	NA	NA	NA
Tetracera	NA	Dilleniales	Dilleniaceae	NA	NA	NA
Tetrastylidium	NA	Santalales	Strombosiaceae	NA	NA	NA
Heisteria	NA	Santalales	Erythropalaceae	NA	NA	NA
Cathedra	NA	Santalales	Erythropalaceae	NA	NA	NA
Schoepfia	NA	Santalales	Schoepfiaceae	NA	NA	NA
Struthanthus	NA	Santalales	Loranthaceae	NA	Psittacantheae	Psittacanthinae
Agonandra	NA	Santalales	Opiliaceae	NA	NA	NA
Acanthosyris	NA	Santalales	Cervantesiaceae	NA	NA	NA
Achatocarpus	NA	Santalales	Achatocarpaceae	NA	NA	NA
Ptychopetalum	NA	Santalales	Olacaceae	NA	NA	NA
Dulacia	NA	Santalales	Olacaceae	NA	NA	NA
Minquartia	NA	Santalales	Coulaceae	NA	NA	NA
Aptandra	NA	Santalales	Aptandraceae	NA	NA	NA
Chaunochiton	NA	Santalales	Aptandraceae	NA	NA	NA
Norantea	Asterids	Ericales	Marcgraviaceae	NA	NA	NA
Clavija	Asterids	Ericales	Primulaceae	NA	NA	NA
Jacquinia	Asterids	Ericales	Primulaceae	NA	NA	NA
Ardisia	Asterids	Ericales	Primulaceae	NA	NA	NA
Geissanthus	Asterids	Ericales	Primulaceae	NA	NA	NA
Stylogyne	Asterids	Ericales	Primulaceae	NA	NA	NA
Parathesis	Asterids	Ericales	Primulaceae	NA	NA	NA
Myrsine	Asterids	Ericales	Primulaceae	NA	NA	NA
Rapanea	Asterids	Ericales	Primulaceae	NA	NA	NA
Lissocarpa	Asterids	Ericales	Ebenaceae	NA	NA	NA
Diospyros	Asterids	Ericales	Ebenaceae	NA	NA	NA
Gordonia	Asterids	Ericales	Theaceae	NA	NA	NA
Saurauia	Asterids	Ericales	Actinidiaceae	NA	NA	NA
Clethra	Asterids	Ericales	Clethraceae	NA	NA	NA
Cyrilla	Asterids	Ericales	Cyrillaceae	NA	NA	NA
Vaccinium	Asterids	Ericales	Ericaceae	NA	NA	NA
Satyria	Asterids	Ericales	Ericaceae	NA	NA	NA
Bertholletia	Asterids	Ericales	Lecythidaceae	NA	NA	NA
Corythophora	Asterids	Ericales	Lecythidaceae	NA	NA	NA
Couratari	Asterids	Ericales	Lecythidaceae	NA	NA	NA
Allantoma	Asterids	Ericales	Lecythidaceae	NA	NA	NA
Couroupita	Asterids	Ericales	Lecythidaceae	NA	NA	NA
Cariniana	Asterids	Ericales	Lecythidaceae	NA	NA	NA
Grias	Asterids	Ericales	Lecythidaceae	NA	NA	NA
Gustavia	Asterids	Ericales	Lecythidaceae	NA	NA	NA
Lecythis	Asterids	Ericales	Lecythidaceae	NA	NA	NA
Eschweilera	Asterids	Ericales	Lecythidaceae	NA	NA	NA
Sideroxylon	Asterids	Ericales	Sapotaceae	NA	NA	NA
Pouteria	Asterids	Ericales	Sapotaceae	NA	NA	NA
Micropholis	Asterids	Ericales	Sapotaceae	NA	NA	NA
Elaeoluma	Asterids	Ericales	Sapotaceae	NA	NA	NA
Pradosia	Asterids	Ericales	Sapotaceae	NA	NA	NA
Ecclinusa	Asterids	Ericales	Sapotaceae	NA	NA	NA
Chrysophyllum	Asterids	Ericales	Sapotaceae	NA	NA	NA
Diploon	Asterids	Ericales	Sapotaceae	NA	NA	NA
Manilkara	Asterids	Ericales	Sapotaceae	NA	NA	NA
Styrax	Asterids	Ericales	Styracaceae	NA	NA	NA
Ternstroemia	Asterids	Ericales	Pentaphylacaceae	NA	NA	NA
Symplocos	Asterids	Ericales	Symplocaceae	NA	NA	NA
Ipomoea	Asterids	Solanales	Convolvulaceae	NA	Ipomoeeae	NA
Duckeodendron	Asterids	Solanales	Solanaceae	NA	NA	NA
Brunfelsia	Asterids	Solanales	Solanaceae	Petunioideae	NA	NA
Cestrum	Asterids	Solanales	Solanaceae	Cestroideae	Cestreae	NA
Solanum	Asterids	Solanales	Solanaceae	Solanoideae	Solaneae	NA
Lycianthes	Asterids	Solanales	Solanaceae	Solanoideae	Capsiceae	NA
Physalis	Asterids	Solanales	Solanaceae	Solanoideae	Physaleae	NA
Bourreria	Asterids	NA	Boraginaceae	NA	NA	NA
Cordia	Asterids	NA	Boraginaceae	NA	NA	NA
Tournefortia	Asterids	NA	Boraginaceae	NA	NA	NA
Heliotropium	Asterids	NA	Boraginaceae	NA	NA	NA
Parahancornia	Asterids	Gentianales	Apocynaceae	Rauvolfioideae1	Willughbeeae	NA
Lacmellea	Asterids	Gentianales	Apocynaceae	Rauvolfioideae1	Willughbeeae	NA
Couma	Asterids	Gentianales	Apocynaceae	Rauvolfioideae1	Willughbeeae	NA
Rauvolfia	Asterids	Gentianales	Apocynaceae	Rauvolfioideae1	Vinceae	NA
Stemmadenia	Asterids	Gentianales	Apocynaceae	Rauvolfioideae1	Tabermontantaneae	NA
Tabernaemontana	Asterids	Gentianales	Apocynaceae	Rauvolfioideae1	Tabermontantaneae	NA
Ambelania	Asterids	Gentianales	Apocynaceae	Rauvolfioideae1	Tabermontantaneae	NA
Mucoa	Asterids	Gentianales	Apocynaceae	Rauvolfioideae1	Tabermontantaneae	NA
Macoubea	Asterids	Gentianales	Apocynaceae	Rauvolfioideae1	Tabermontantaneae	NA
Malouetia	Asterids	Gentianales	Apocynaceae	Apocynoideae	Malouetieae	NA
Matelea	Asterids	Gentianales	Apocynaceae	Apocynoideae	Asclepiadeae	NA
Prestonia	Asterids	Gentianales	Apocynaceae	Apocynoideae	Echiteae	NA
Thevetia	Asterids	Gentianales	Apocynaceae	NA	Plumerieae	NA
Allamanda	Asterids	Gentianales	Apocynaceae	NA	Plumerieae	NA
Plumeria	Asterids	Gentianales	Apocynaceae	NA	Plumerieae	NA
Himatanthus	Asterids	Gentianales	Apocynaceae	NA	Plumerieae	NA
Geissospermum	Asterids	Gentianales	Apocynaceae	NA	Alstonieae	NA
Aspidosperma	Asterids	Gentianales	Apocynaceae	NA	Alstonieae	NA
Strychnos	Asterids	Gentianales	Loganiaceae	NA	NA	NA
Antonia	Asterids	Gentianales	Loganiaceae	NA	NA	NA
Bonyunia	Asterids	Gentianales	Loganiaceae	NA	NA	NA
Dialypetalanthus	Asterids	Gentianales	Rubiaceae	NA	NA	NA
Faramea	Asterids	Gentianales	Rubiaceae	Rubioideae	NA	NA
Psychotria	Asterids	Gentianales	Rubiaceae	Rubioideae	Psychotrieae	NA
Palicourea	Asterids	Gentianales	Rubiaceae	Rubioideae	Psychotrieae	NA
Rudgea	Asterids	Gentianales	Rubiaceae	Rubioideae	Psychotrieae	NA
Morinda	Asterids	Gentianales	Rubiaceae	Rubioideae	Morindeae	NA
Pagamea	Asterids	Gentianales	Rubiaceae	Rubioideae	Gaertnereae	NA
Coussarea	Asterids	Gentianales	Rubiaceae	Rubioideae	NA	NA
Hemidiodia	Asterids	Gentianales	Rubiaceae	Rubioideae	NA	NA
Spermacoce	Asterids	Gentianales	Rubiaceae	Rubioideae	Spermacoceae	NA
Diodia	Asterids	Gentianales	Rubiaceae	Rubioideae	Spermacoceae	NA
Posoqueria	Asterids	Gentianales	Rubiaceae	Ixoroideae	Posoquerieae	NA
Chimarrhis	Asterids	Gentianales	Rubiaceae	Ixoroideae	Condamineeae	NA
Ferdinandusa	Asterids	Gentianales	Rubiaceae	Ixoroideae	Condamineeae	NA
Capirona	Asterids	Gentianales	Rubiaceae	Ixoroideae	Condamineeae	NA
Alseis	Asterids	Gentianales	Rubiaceae	Ixoroideae	Condamineeae	NA
Simira	Asterids	Gentianales	Rubiaceae	Ixoroideae	Condamineeae	NA
Pentagonia	Asterids	Gentianales	Rubiaceae	Ixoroideae	Condamineeae	NA
Hippotis	Asterids	Gentianales	Rubiaceae	Ixoroideae	Condamineeae	NA
Warszewiczia	Asterids	Gentianales	Rubiaceae	Ixoroideae	Condamineeae	NA
Calycophyllum	Asterids	Gentianales	Rubiaceae	Ixoroideae	Condamineeae	NA
Bathysa	Asterids	Gentianales	Rubiaceae	Ixoroideae	Condamineeae	NA
Macrocnemum	Asterids	Gentianales	Rubiaceae	Ixoroideae	Condamineeae	NA
Rustia	Asterids	Gentianales	Rubiaceae	Ixoroideae	Condamineeae	NA
Sabicea	Asterids	Gentianales	Rubiaceae	Ixoroideae	Sabiceeae	NA
Retiniphyllum	Asterids	Gentianales	Rubiaceae	Ixoroideae	Retiniphylleae	NA
Ixora	Asterids	Gentianales	Rubiaceae	Ixoroideae	Ixoreae	NA
Genipa	Asterids	Gentianales	Rubiaceae	Ixoroideae	Gardenieae	NA
Randia	Asterids	Gentianales	Rubiaceae	Ixoroideae	Gardenieae	NA
Rosenbergiodendron	Asterids	Gentianales	Rubiaceae	Ixoroideae	Gardenieae	NA
Tocoyena	Asterids	Gentianales	Rubiaceae	Ixoroideae	Gardenieae	NA
Kutchubaea	Asterids	Gentianales	Rubiaceae	Ixoroideae	Gardenieae	NA
Botryarrhena	Asterids	Gentianales	Rubiaceae	Ixoroideae	Gardenieae	NA
Stachyarrhena	Asterids	Gentianales	Rubiaceae	Ixoroideae	Gardenieae	NA
Borojoa	Asterids	Gentianales	Rubiaceae	Ixoroideae	Gardenieae	NA
Alibertia	Asterids	Gentianales	Rubiaceae	Ixoroideae	Gardenieae	NA
Amaioua	Asterids	Gentianales	Rubiaceae	Ixoroideae	Gardenieae	NA
Duroia	Asterids	Gentianales	Rubiaceae	Ixoroideae	Gardenieae	NA
Chione	Asterids	Gentianales	Rubiaceae	Cinchonoideae	NA	NA
Rondeletia	Asterids	Gentianales	Rubiaceae	Cinchonoideae	NA	NA
Machaonia	Asterids	Gentianales	Rubiaceae	Cinchonoideae	Guettardeae	NA
Malanea	Asterids	Gentianales	Rubiaceae	Cinchonoideae	Guettardeae	NA
Gonzalagunia	Asterids	Gentianales	Rubiaceae	Cinchonoideae	Guettardeae	NA
Guettarda	Asterids	Gentianales	Rubiaceae	Cinchonoideae	Guettardeae	NA
Chomelia	Asterids	Gentianales	Rubiaceae	Cinchonoideae	Guettardeae	NA
Isertia	Asterids	Gentianales	Rubiaceae	Cinchonoideae	Isertieae	NA
Joosia	Asterids	Gentianales	Rubiaceae	Cinchonoideae	Cinchoneae	NA
Remijia	Asterids	Gentianales	Rubiaceae	Cinchonoideae	Cinchoneae	NA
Ladenbergia	Asterids	Gentianales	Rubiaceae	Cinchonoideae	Cinchoneae	NA
Cinchona	Asterids	Gentianales	Rubiaceae	Cinchonoideae	Cinchoneae	NA
Cosmibuena	Asterids	Gentianales	Rubiaceae	Cinchonoideae	Hillieae	NA
Hamelia	Asterids	Gentianales	Rubiaceae	Cinchonoideae	Hillieae	NA
Hillia	Asterids	Gentianales	Rubiaceae	Cinchonoideae	Hillieae	NA
Chiococca	Asterids	Gentianales	Rubiaceae	Cinchonoideae	Chiococceae	NA
Coutarea	Asterids	Gentianales	Rubiaceae	Cinchonoideae	Chiococceae	NA
Exostema	Asterids	Gentianales	Rubiaceae	Cinchonoideae	Chiococceae	NA
Hydrolea	Asterids	NA	Hydroleaceae	NA	NA	NA
Drymonia	Asterids	Lamiales	Gesneriaceae	NA	Gesnerieae	Columneinae
Gasteranthus	Asterids	Lamiales	Gesneriaceae	NA	Beslerieae	NA
Besleria	Asterids	Lamiales	Gesneriaceae	NA	Beslerieae	NA
Jacaranda	Asterids	Lamiales	Bignoniaceae	NA	Jacarandeae	NA
Zeyheria	Asterids	Lamiales	Bignoniaceae	NA	NA	NA
Tabebuia	Asterids	Lamiales	Bignoniaceae	NA	NA	NA
Amphitecna	Asterids	Lamiales	Bignoniaceae	NA	Crescentieae	NA
Crescentia	Asterids	Lamiales	Bignoniaceae	NA	Crescentieae	NA
Petrea	Asterids	Lamiales	Verbenaceae	NA	Petreeae	NA
Verbena	Asterids	Lamiales	Verbenaceae	NA	Verbeneae	NA
Lantana	Asterids	Lamiales	Verbenaceae	NA	Lantaneae	NA
Stachytarpheta	Asterids	Lamiales	Verbenaceae	NA	Duranteae	NA
Aegiphila	Asterids	Lamiales	Lamiaceae	Teucrioideae	NA	NA
Clerodendrum	Asterids	Lamiales	Lamiaceae	Teucrioideae	NA	NA
Vitex	Asterids	Lamiales	Lamiaceae	Viticoideae	NA	NA
Callicarpa	Asterids	Lamiales	Lamiaceae	NA	NA	NA
Buddleja	Asterids	Lamiales	Scrophulariaceae	NA	Buddlejeae	NA
Avicennia	Asterids	Lamiales	Acanthaceae	Avicennioideae	NA	NA
Aphelandra	Asterids	Lamiales	Acanthaceae	Acanthoideae	Acantheae	NA
Justicia	Asterids	Lamiales	Acanthaceae	Acanthoideae	Ruellieae	Justiciinae
Ruellia	Asterids	Lamiales	Acanthaceae	Acanthoideae	Ruellieae	Ruelliinae
Trichanthera	Asterids	Lamiales	Acanthaceae	Acanthoideae	Ruellieae	Ruelliinae
Sanchezia	Asterids	Lamiales	Acanthaceae	Acanthoideae	Ruellieae	Ruelliinae
Chionanthus	Asterids	Lamiales	Oleaceae	NA	NA	NA
Metteniusa	Asterids	NA	Metteniusaceae	NA	NA	NA
Poraqueiba	Asterids	NA	NA	NA	NA	NA
Emmotum	Asterids	NA	NA	NA	NA	NA
Dendrobangia	Asterids	NA	Icacinaceae	NA	NA	NA
Stenopadus	Asterids	Asterales	Asteraceae	Wunderlichioideae	Wunderlichieae	NA
Baccharis	Asterids	Asterales	Asteraceae	Asteroideae	Astereae	NA
Piptocarpha	Asterids	Asterales	Asteraceae	Cichorioideae	Vernonieae	Piptocarphinae
Burmeistera	Asterids	Asterales	Campanulaceae	NA	NA	NA
Centropogon	Asterids	Asterales	Campanulaceae	NA	NA	NA
Viburnum	Asterids	NA	Adoxaceae	NA	NA	NA
Sambucus	Asterids	NA	Adoxaceae	NA	NA	NA
Schefflera	Asterids	Apiales	Araliaceae	NA	NA	NA
Discophora	Asterids	Aquifoliales	Stemonuraceae	NA	NA	NA
Ilex	Asterids	Aquifoliales	Aquifoliaceae	NA	NA	NA
Cissus	NA	Vitales	Vitaceae	NA	NA	NA
Coccoloba	NA	Caryophyllales	Polygonaceae	NA	NA	NA
Triplaris	NA	Caryophyllales	Polygonaceae	NA	NA	NA
Ruprechtia	NA	Caryophyllales	Polygonaceae	NA	NA	NA
Rhabdodendron	NA	Caryophyllales	Rhabdodendraceae	NA	NA	NA
Opuntia	NA	Caryophyllales	Cactaceae	Opuntioideae	NA	NA
Pereskia	NA	Caryophyllales	Cactaceae	Pereskioideae	NA	NA
Mirabilis	NA	Caryophyllales	Nyctaginaceae	NA	NA	NA
Bougainvillea	NA	Caryophyllales	Nyctaginaceae	NA	NA	NA
Neea	NA	Caryophyllales	Nyctaginaceae	NA	NA	NA
Guapira	NA	Caryophyllales	Nyctaginaceae	NA	NA	NA
Phytolacca	NA	Caryophyllales	Phytolaccaceae	NA	NA	NA
Rivina	NA	Caryophyllales	Phytolaccaceae	NA	NA	NA
Petiveria	NA	Caryophyllales	Phytolaccaceae	NA	NA	NA
Roupala	NA	NA	Proteaceae	NA	NA	NA
Euplassa	NA	NA	Proteaceae	NA	NA	NA
Panopsis	NA	NA	Proteaceae	NA	NA	NA
Buxus	NA	Buxales	Buxaceae	NA	NA	NA
Meliosma	NA	NA	Sabiaceae	NA	NA	NA
Ophiocaryon	NA	NA	Sabiaceae	NA	NA	NA
